# Supplementary material for: The C-terminal Residues of Saccharomyces cerevisiae Mec1 Are Required for Its Localization, Stability, and Function
Source: PubMed Central journal article supplement (PMC3789791; doi:10.1534/g3.113.006841), 2013-10-01
Supplement: supp_g3.113.006841_006841SI.pdf [file supp_g3.113.006841_006841SI.pdf]

**The C-terminal Residues of *Saccharomyces cerevisiae* Mec1 are required for its Localization, Stability and Function**

Lance F. DaSilva<sup>\*</sup>, Samantha Pillon<sup>\*</sup>, Julie Genereaux<sup>\*</sup>, Megan J. Davey<sup>\*</sup>, Gregory B. Gloor<sup>\*</sup>, Jim Karagiannis<sup>§</sup> and Christopher J. Brandl<sup>\*</sup>

<sup>\*</sup>Department of Biochemistry, Schulich School of Medicine & Dentistry, The University of Western Ontario, London Canada N6A5C1

<sup>§</sup> Department of Biology, The University of Western Ontario, London Canada N6A 5B7

**DOI: 10.1534/g3.113.006841**

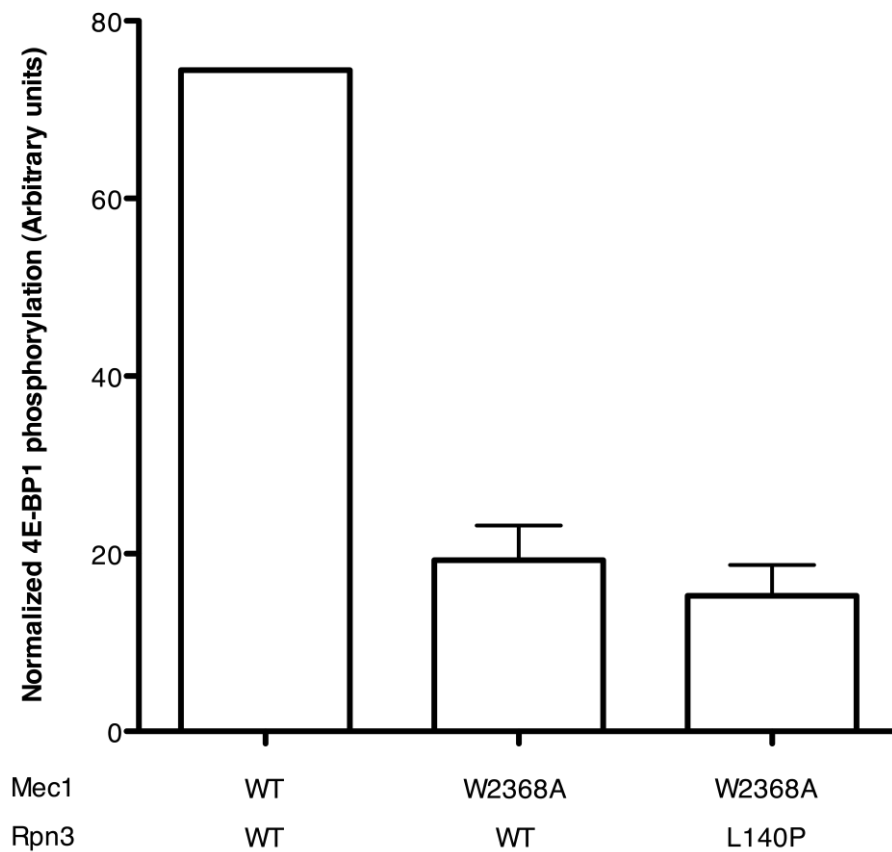

**Figure S1** *rpn3-L140P* does not increase Mec1-W2368A kinase activity. Protein extracts were prepared by bead lysis in buffer containing protease inhibitors from strains CY6194 (*Flag<sup>5</sup>-MEC1 RPN3*), CY6175 (*Flag<sup>5</sup>-mec1-W2368A RPN3*) and CY6391 (*Flag<sup>5</sup>-mec1-W2368A rpn3-L140P*) grown at 30°. Two milligrams of protein was immunoprecipitated with anti-Flag M2 magnetic beads. Two-thirds of the immunoprecipitate was suspended in 60  $\mu$ l of kinase buffer. Aliquots of four microliters were used in kinase assays performed at 30° with 4E-BP1 as substrate. Shown is the amount of 4E-BP1 phosphorylation normalized to Mec1 protein levels. Error bars represent the mean  $\pm$  SD of three replicates.
